# Supplementary material
Source: publisher figshare collection journal article supplement (https://acs.figshare.com/ndownloader/files/4033327)
Supplement: Supplementary file 1 [file 4033327]

## Supporting Information:

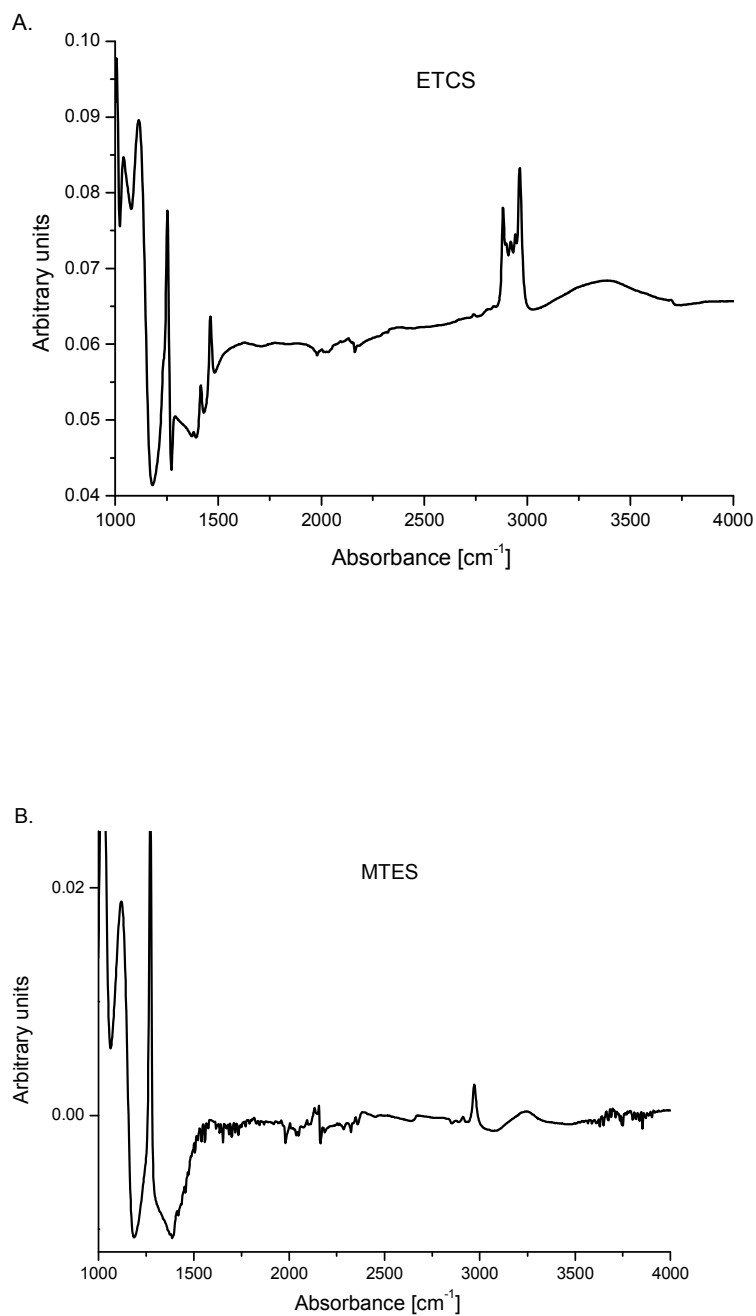

**Figure S1.** ATR-IR spectra of a coated glass substrate with **(A)** ETCS and **(B)** MTES used as precursors.

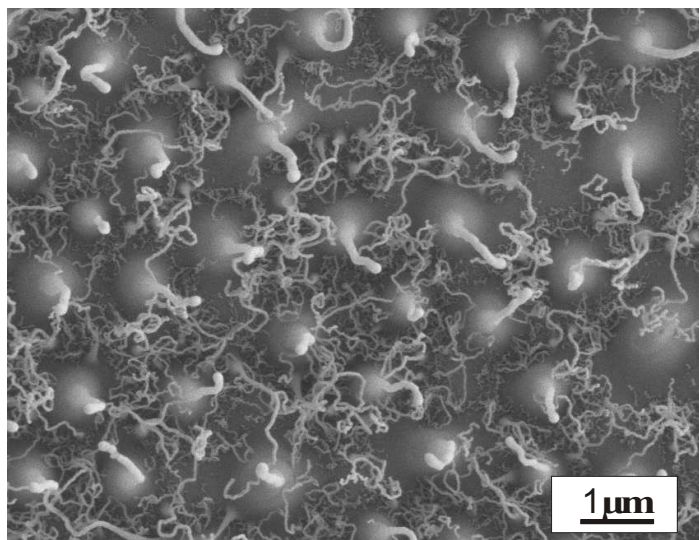

**Figure S2.** SEM image of mixed morphology consisting of nanofilaments and tapered nanotubes when 4.2 mmol of water is present in the reaction

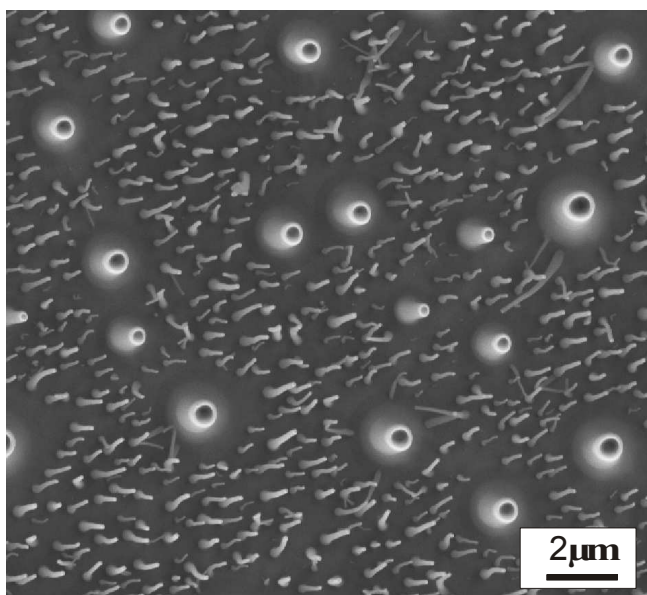

**Figure S3.** SEM image of mixed morphology consisting of tapered nanotubes and microtubes when 5 mmol of water is present in the reaction

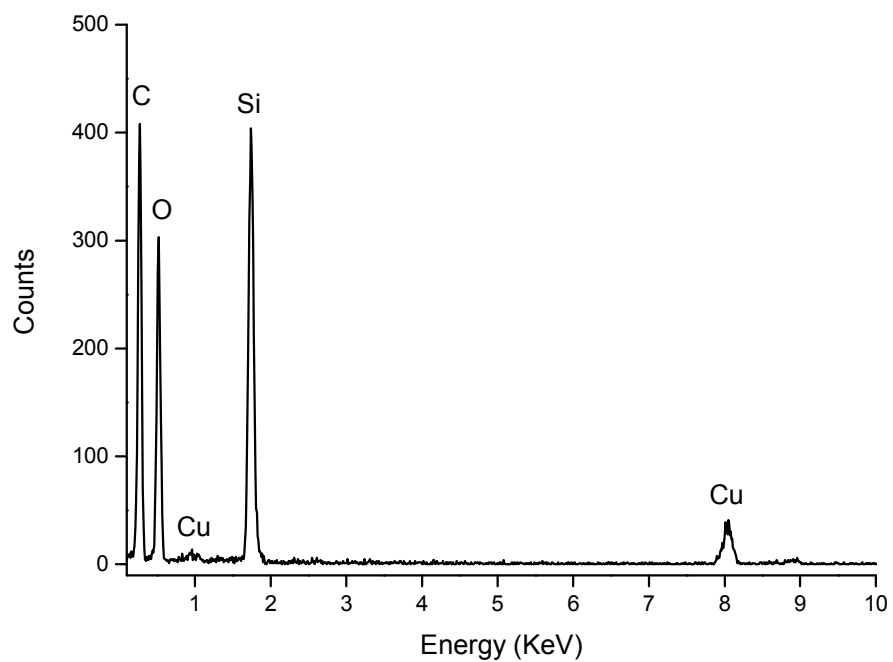

**Figure S4.** EDX spectra of polysiloxane layer formed after 10 seconds of the reaction when ETCS is used as a precursor

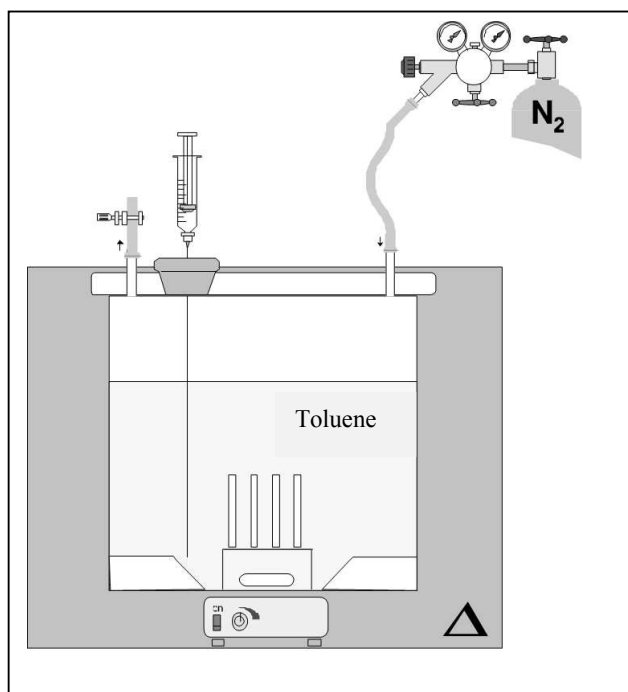

**Figure S5.** Setup of the liquid phase method for the production of polysiloxane nanotubes and nanofilaments.

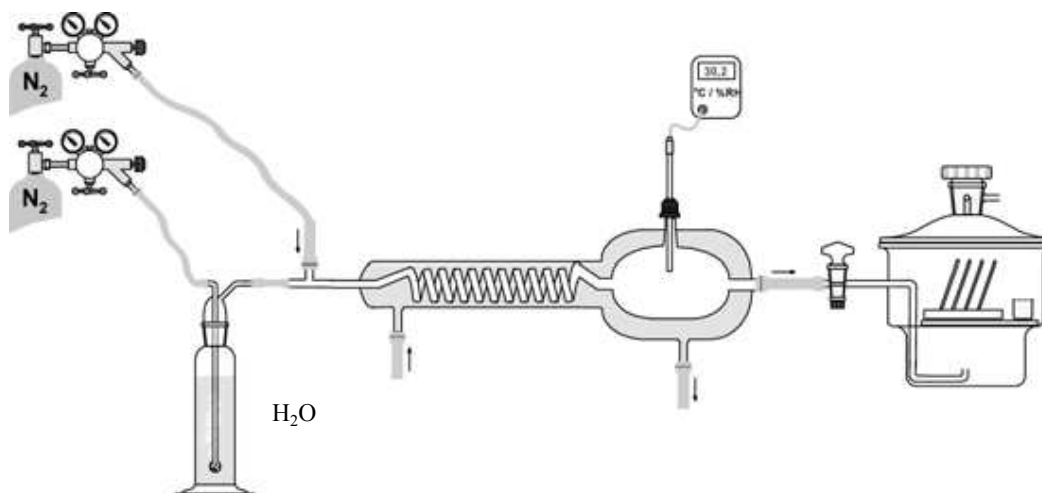

**Figure S6.** Setup of the chemical vapor deposition (CVD) method for the production of polysiloxane nanotubes and nanofilaments.

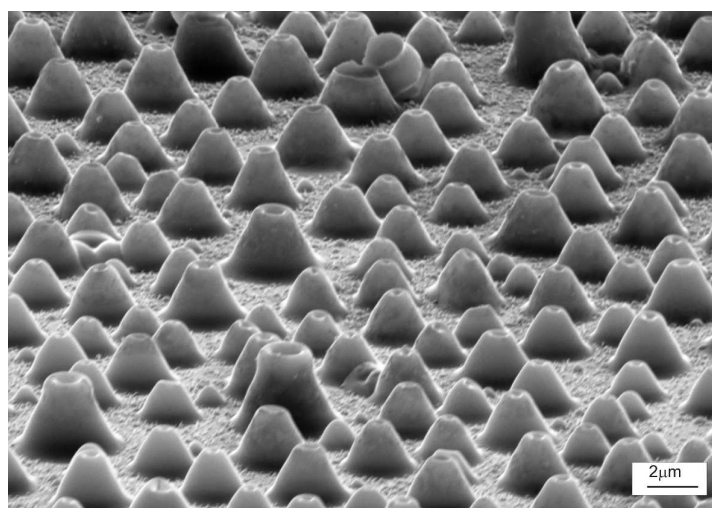

**Figure S7.** SEM image of microtubes, side projection

#### **Humidity measurements:**

The experiments were repeated several times with the same setup. A hygrometer (E+E Elektronik) was used to measure the relative humidity in the reaction chamber. These values were crosschecked by using a second relative humidity sensor. Both hygrometers were calibrated with a reference-sensor. If the relative humidity (RH) in gas phase was in the range between 0 and 90% relative error of instrument was by manufacturer  $(1.3\% + 0.3\% \cdot \text{RH})$ . For the determination of the humidity in solvent-phase coating a Karl-Fischer Coloumeter was used. 1ml of toluene was inserted with a syringe to the Coloumeter and measured with a drift below  $3\mu\text{g}/\text{min}$ .
